# Supplementary material for: Surface Immobilization of pH-Responsive Polymer Brushes on Mesoporous Silica Nanoparticles by Enzyme Mimetic Catalytic ATRP for Controlled Cargo Release
Source: MDPI journal article supplement (doi:10.3390/polym8080277), 2016-08-02
Supplement: s1 [file s1]

# Supplementary Materials: Surface Immobilization of pH-Responsive Polymer Brushes on Mesoporous Silica Nanoparticles by Enzyme Mimetic Catalytic ATRP for Controlled Cargo Release

Hang Zhou, Xin Wang, Jun Tang and Ying-Wei Yang

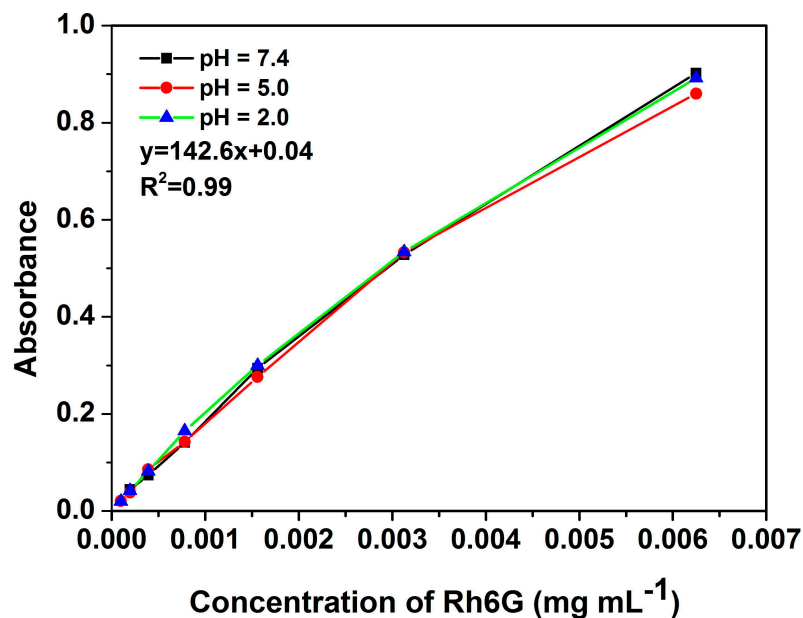

Figure S1. Calibration curves for rhodamine 6G in different PBS buffers.

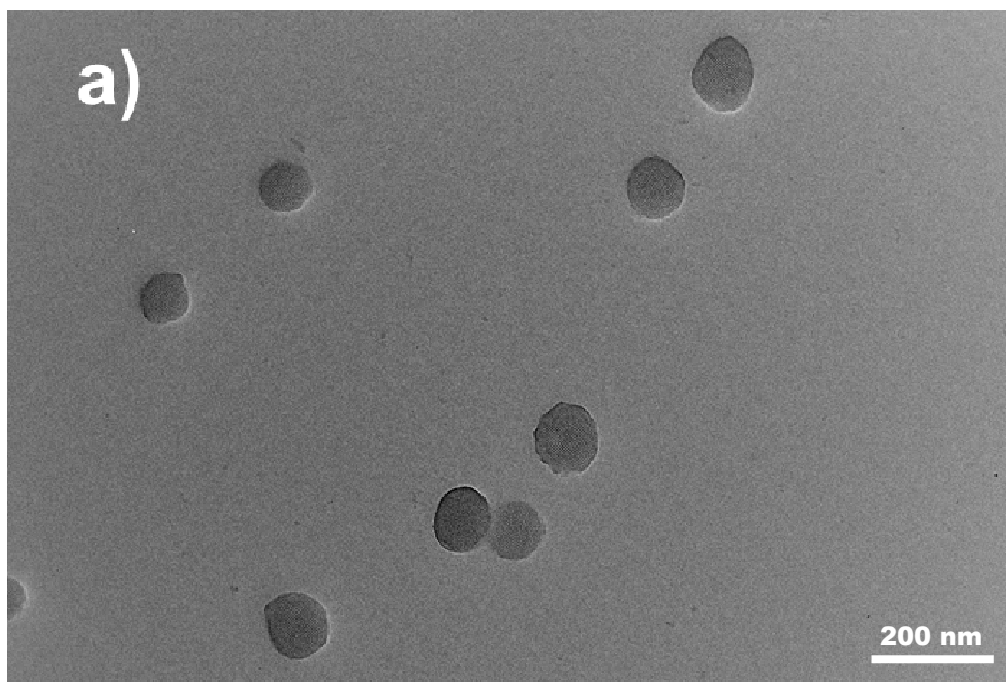

Figure S2. Cont.

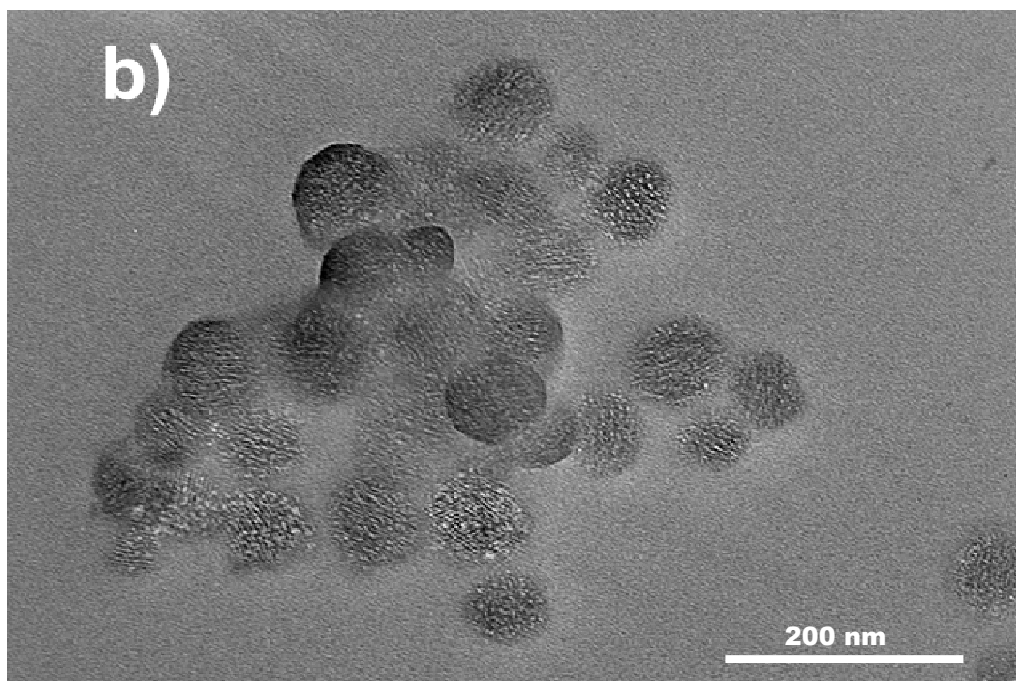

**Figure S2.** TEM images of (a) MSN-OH and (b) MSN-PDMAEMA.

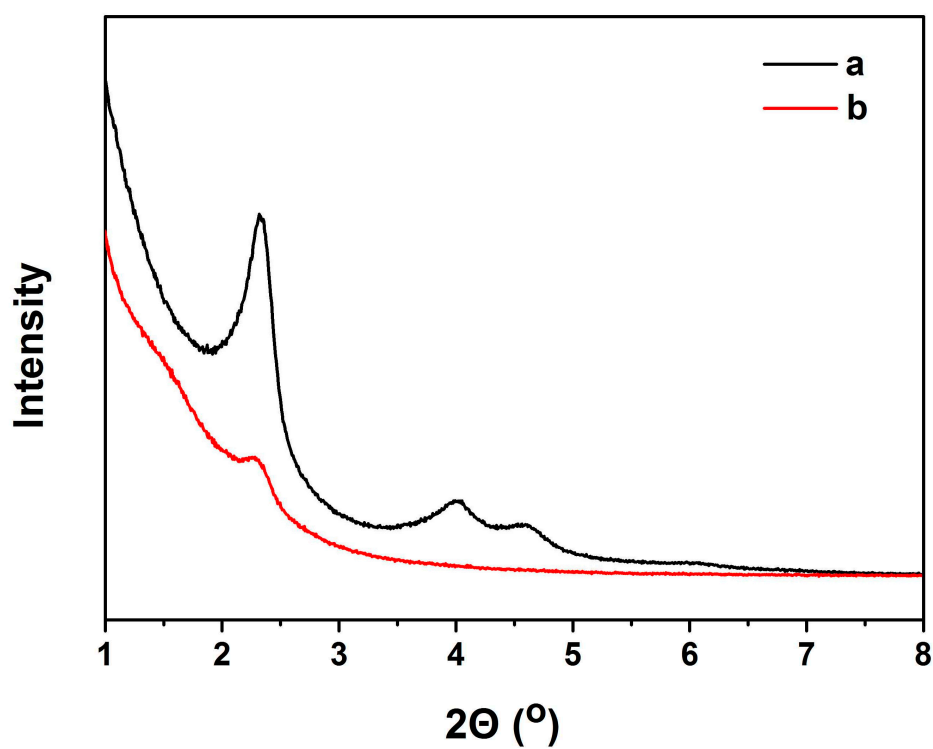

**Figure S3.** The small-angle powder XRD of (a) MSN-OH and (b) MSN-PDMAEMA.

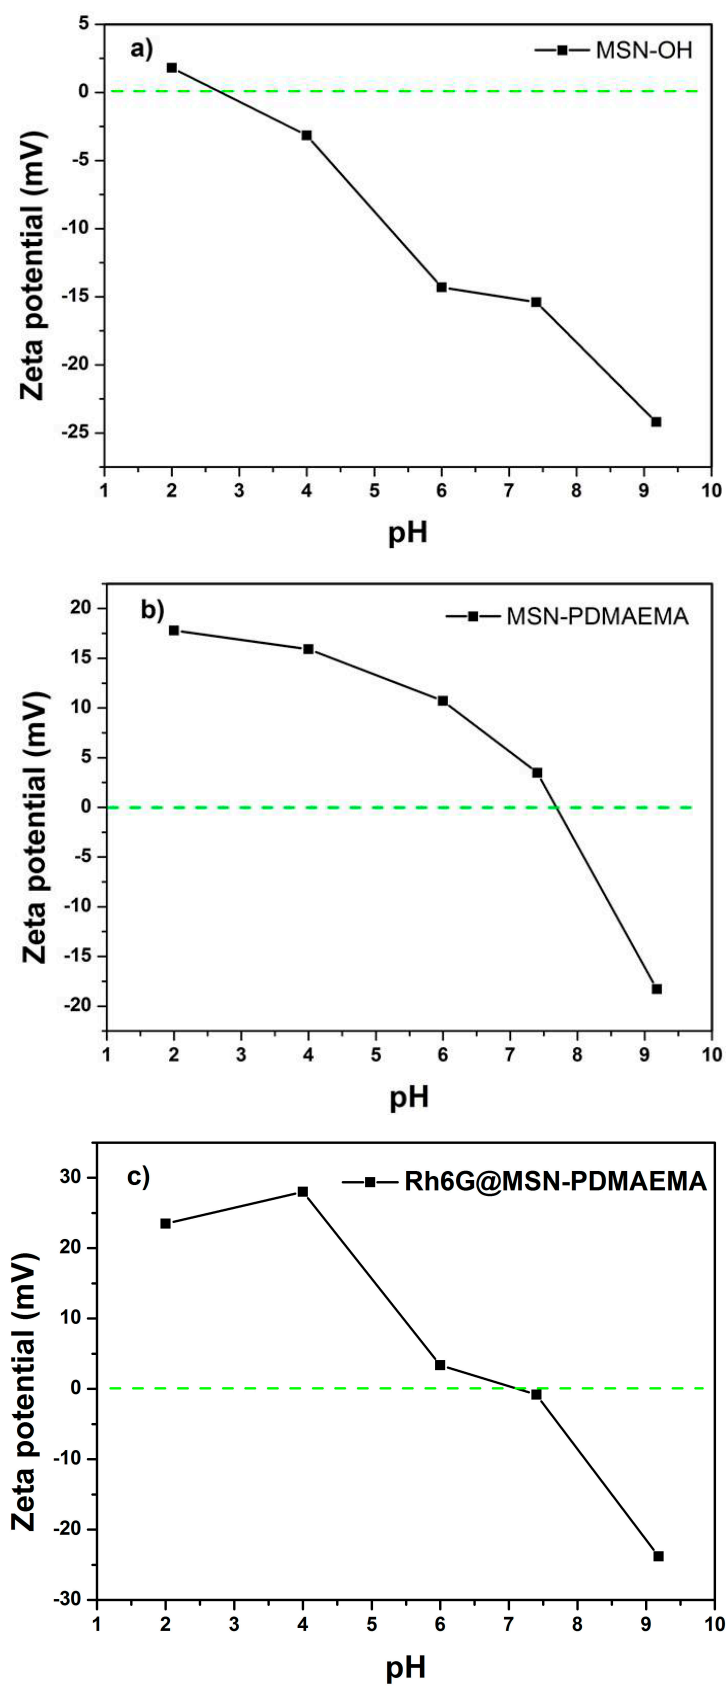

**Figure S4.** pH-Dependency of the apparent Zeta-potential values of MSNs in different PBS buffers: (a) MSN-OH; (b) MSN-PDMAEMA; and (c) Rh6G@MSN-PDMAEMA.

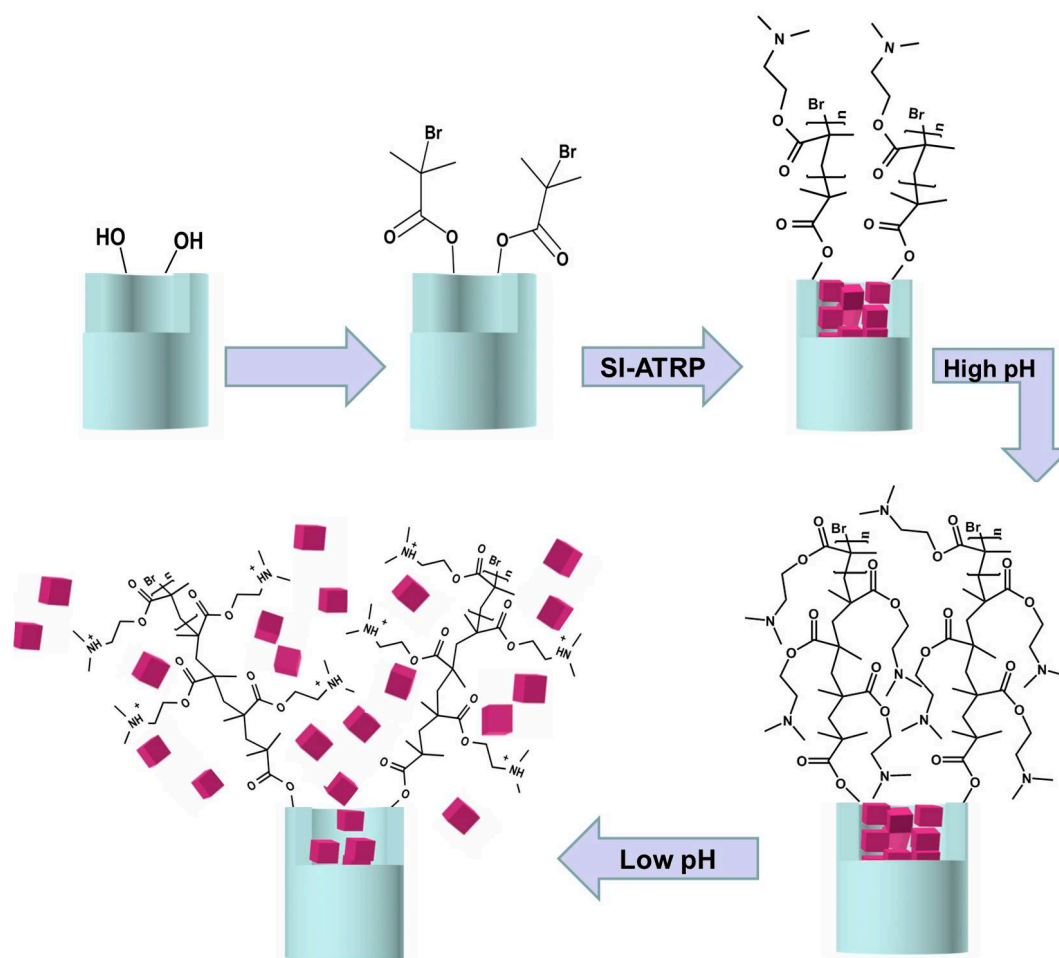

**Scheme S1.** Schematic representation of the preparation of Rh6G@MSN-PDMAEMA via SI-ATRP and the operation of the switching of polymer brushes on MSNs by pH changes.

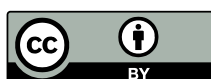

© 2016 by the authors; licensee MDPI, Basel, Switzerland. This article is an open access article distributed under the terms and conditions of the Creative Commons Attribution (CC-BY) license (<http://creativecommons.org/licenses/by/4.0/>).
